# Supplementary material for: Dirhodium(ii) complex catalyzed dehydrosilylation of styrenes: theoretical investigations on the mechanism, selectivity, and ligand effects
Source: Royal Society of Chemistry journal article supplement (doi:10.1039/d4cp02576h), 2024-01-01
Supplement: d4cp02576h1.pdf [file d4cp02576h1.pdf]

# Supporting Information for

## Dirhodium(II) Complexes Catalyzed Dehydrosilylation of Styrenes: Theoretical Investigations on Mechanism, Selectivity, and Ligands Effects

Ziying Zhong<sup>a</sup>, Qingzhong Li<sup>b</sup>, Xiaoyan Li<sup>a, \*</sup>

<sup>a</sup>College of Chemistry and Material Science, Hebei Key Laboratory of Inorganic and Nano-Materials, National Demonstration Center for Experimental Chemistry, Hebei Normal University, Shijiazhuang, 050024, P. R. China.

<sup>b</sup>The Laboratory of Theoretical and Computational Chemistry, College of Chemistry & Chemical Engineering, Yantai University, Yantai, 264005, China.

### Contents

|                                                                                                                                                                                                                           |     |
|---------------------------------------------------------------------------------------------------------------------------------------------------------------------------------------------------------------------------|-----|
| Figure S1 Free energy profiles without translational entropy correction in the solution .....                                                                                                                             | S2  |
| Scheme S1 Frontier molecular orbitals of C'(a) HOMO (b) LUMO. ....                                                                                                                                                        | S4  |
| Scheme S2 Other three isomers of the catalyst C. ....                                                                                                                                                                     | S5  |
| Scheme S3 The NPA parameters of C'/C". (The red numbers are the Wiberg bond indices, and the blue numbers are the NPA charges.).....                                                                                      | S6  |
| Table S1 Gibbs free energies of alkylene insertion reaction ( $E' \rightarrow TS3 \rightarrow F'$ , in kcal/ mol) calculated using different DFT methods. ....                                                            | S7  |
| Table S2 The absolute electronic energy without corrections, correction to free energy, sum of $E_{\text{elec}}$ and $G_{\text{corr}}$ , the output $G$ from THERMO of each species and relative Gibbs free energies..... | S9  |
| Table S3 ADF results for TSa, INT, TSb and TSc. ....                                                                                                                                                                      | S13 |
| Table S4 ADF results for the simplified of the TSa, INT, TSb and TSc.....                                                                                                                                                 | S13 |
| Table S5 ADF results for TS4a, TS4b and TS5. ....                                                                                                                                                                         | S14 |

---

\*To whom correspondence should be addressed.

E-mail: [lixiaoyan@hebtu.edu.cn](mailto:lixiaoyan@hebtu.edu.cn)

Tel: (+86)311-80787427

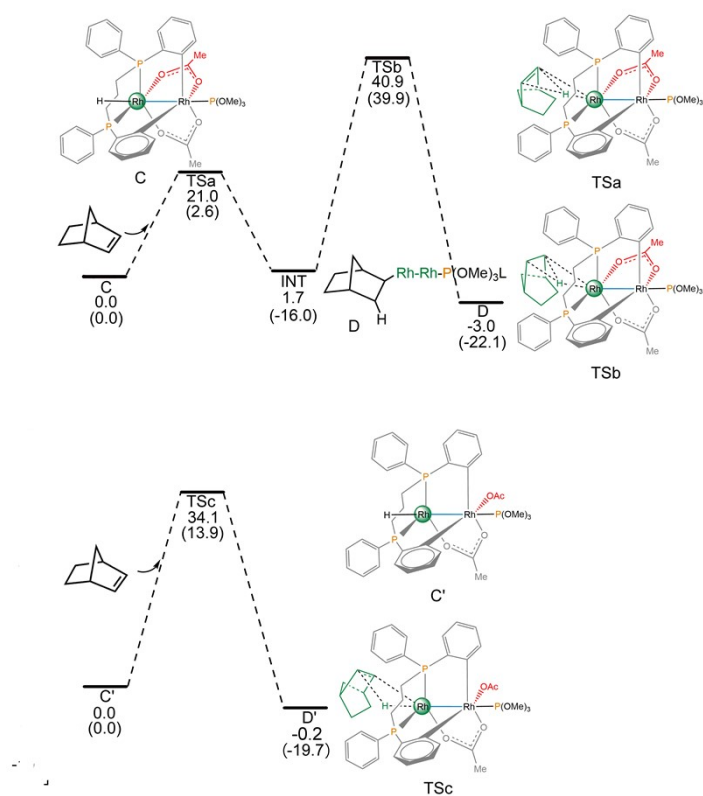

(a)

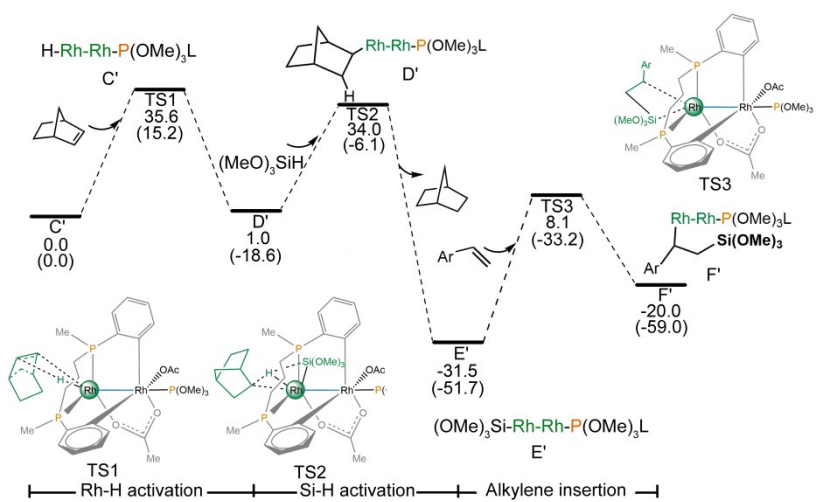

(b)

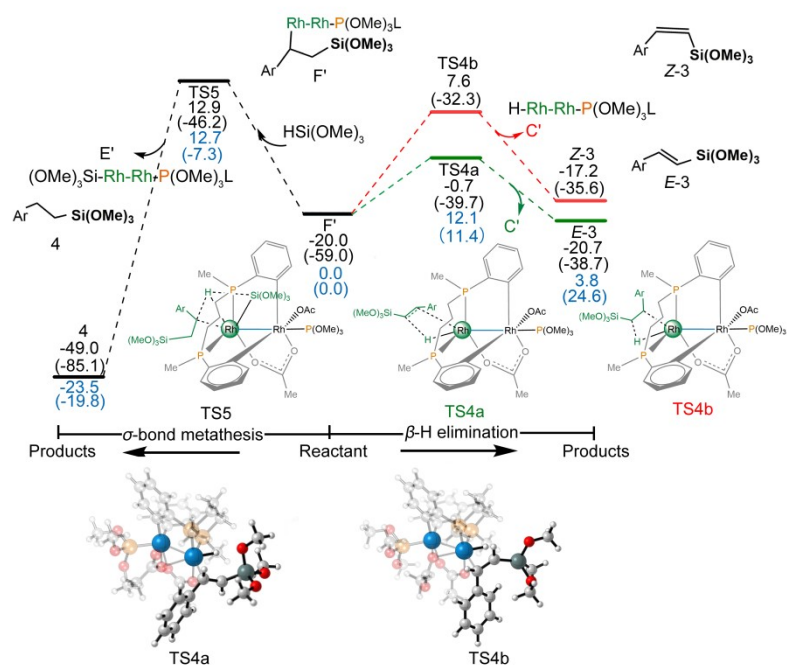

(c)

Figure S1 Free energy profiles without translational entropy correction in the solution

Scheme S1 Frontier molecular orbitals of C'(a) HOMO (b) LUMO.

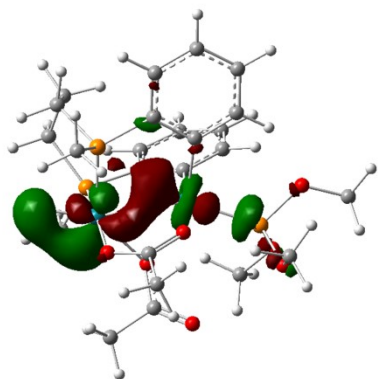

(a) HOMO(-2.31eV)

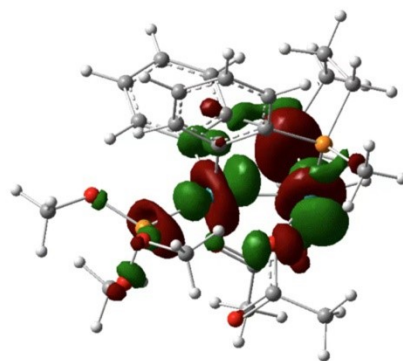

(b) LUMO(-1.31eV)

Scheme S2 Other three isomers of the catalyst C.

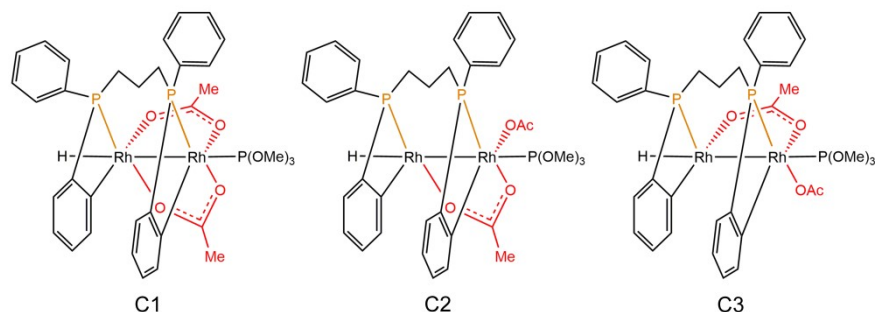

C1, C2, and C3 are the other three isomers of C (two Rh-P bonds on the same Rh atom). In all of these three isomers, one Rh-P bond on each Rh, rather than both to the same Rh. In C1, the two OAc ligands are bidentate two Rh atoms. In both C2 and C3, one OAc ligand is bidentate and the other OAc groups in monodentate. The difference between C2 and C3 are the positions of bidentate OAc and dppp ligand. In C2, the bidentate OAc locates at the opposite of dppp ligand. In C3, the bidentate OAc is neighbor to the dppp ligand. The free energy of C1, C2, and C3 is 28.1kcal/mol, 33.5kcal/mol, and 33.8 kcal/mol higher than that of C.

Scheme S3 The NPA parameters of C'/C". (The red numbers are the Wiberg bond indices, and the blue numbers are the NPA charges.)

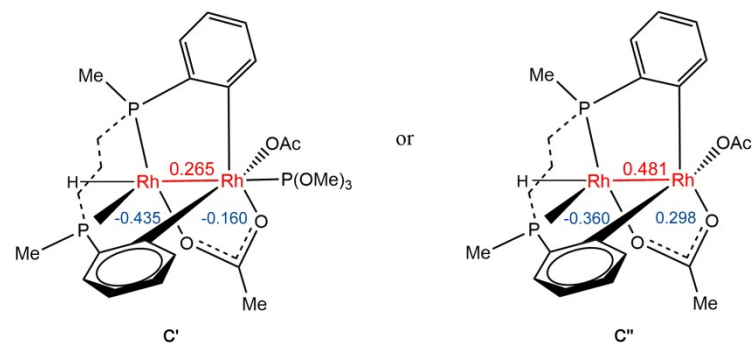

Table S1 Gibbs free energies of alkylene insertion reaction ( $E' \rightarrow \text{TS3} \rightarrow F'$ , in kcal/ mol) calculated using different DFT methods.

|                                       | GGA  |      | mGGA |      | hybrid GGA |        |      | hybrid mGGA |        |       |
|---------------------------------------|------|------|------|------|------------|--------|------|-------------|--------|-------|
|                                       | BP86 | M06L | B97D | PBE  | B3LYP      | B3PW91 | PBE0 | M06         | M06-D3 | M062X |
| $\Delta G_{\text{Thermo}}^{\ddagger}$ | 27.7 | 26.0 | 38.1 | 32.6 | 35.0       | 29.0   | 30.5 | 48.9        | 22.3   | 29.0  |
| $\Delta G_{\text{Thermo}}$            | 2.5  | 2.7  | 8.3  | 4.7  | 6.2        | 2.3    | 2.4  | 24.7        | -0.2   | 2.0   |

In order to ensure the accuracy of the calculation results, different DFT methods (M06, M062X, M06L, BP86, B97D, PBE, B3LYP, B3PW91, PBE0) were used to calculate the single point energies of above process.  $\Delta G_{\text{Thermo}}^{\ddagger}$  is the Gibbs free energy barrier and  $\Delta G_{\text{Thermo}}$  is the free energy changes. As it is shown, the results of mGGA and GGA functionals are poor, those using M062X density functionals of hybrid mGGA, B3PW91 and PBE0 of hybrid GGA give better results comparing to other density functionals. The benchmarking indicates that the hybrid GGA performs better than hybrid mGGA for free energy barriers, which is the same as the conclusions of Schoenebeck's group (Chem. Rev. 2015, 115, 9532). Therefore, the results gotten from PBE0 method are used for the free energy discussion.

Refs:

- [**M06L**] Y. Zhao and D. G. Truhlar, "A new local density functional for main-group thermochemistry, transition metal bonding, thermochemical kinetics, and noncovalent interactions," *J. Chem. Phys.* **2006**, *125*, 194101.
- [**M06**] Y. Zhao and D. G. Truhlar, "The M06 suite of density functionals for main group thermochemistry, thermochemical kinetics, noncovalent interactions, excited states, and transition elements: two new functionals and systematic testing of four M06-class functionals and 12 other functionals," *Theor. Chem. Acc.* **2008**, *120*, 215-241.
- [**B3LYP**] A. D. Becke, "Density-functional thermochemistry. III. The role of exact exchange," *J. Chem. Phys.* **1993**, *98*, 5648-5652.
- [**B97D**] S. Grimme, "Semiempirical GGA-type density functional constructed with a long-range dispersion correction," *J. Comp. Chem.* **2006**, *27*, 1787-1799.

- [M062X] Y. Zhao and D. G. Truhlar, "Comparative DFT study of van der Waals complexes: Rare-gas dimers, alkaline-earth dimers, zinc dimer, and zinc-rare-gas dimers," *J. Phys. Chem.* **2006**, *110*, 5121-5129.
- [BP86] J. P. Perdew, W. Yue, Accurate and simple density functional for the electronic exchange energy: Generalized gradient approximation. *Phys. Rev. B*, 1986, *33*, 8800-8802.
- [B3] A. D. Becke, Density-functional exchange-energy approximation with correct asymptotic behavior. *Phys. Rev. A*, **1988**, *38*, 3098-3100.
- [PW91] J. P. Perdew, K. Burke and Y. Wang, Generalized gradient approximation for the exchange-correlation hole of a many-electron system. *Phys. Rev. B*, **1997**, *54*, 16533-16539.



Table S2 The absolute electronic energy without corrections ( $E_{\text{ele}}$ , in Hartee), correction to free energy( $G_{\text{corr}}$ , in Hartee), sum of  $E_{\text{ele}}$  and  $G_{\text{corr}}$  ( $G$ , in Hartee), the output  $G$  from THERMO ( $G_{\text{Thermo}}$ , in Hartee) of each species and relative Gibbs free energies( $\Delta G$ , in kcal/mol).

|                                                                                | $E_{\text{ele}}$ | $G_{\text{corr}}$ | $G_{(E_{\text{ele}}+G_{\text{corr}})}$ | $\Delta G$ | $G_{\text{Thermo}}$ | $\Delta G_{\text{Thermo}}$ |
|--------------------------------------------------------------------------------|------------------|-------------------|----------------------------------------|------------|---------------------|----------------------------|
| H-Rh-Rh(dppp)(POMe <sub>3</sub> )(OAc) <sub>2</sub> (C)                        | -3090.0125       | 0.5573            | -3089.4552                             |            | -3089.4419          |                            |
| NBE                                                                            | -272.4993        | 0.1111            | -272.3882                              |            | -272.3734           |                            |
| C+NBE                                                                          | -3362.5118       | 0.6684            | -3361.8434                             | 0.0        | -3361.8153          | 0.0                        |
| TSa                                                                            | -3362.5070       | 0.6972            | -3361.8098                             | 21.0       | -3361.7967          | 11.7                       |
| INT                                                                            | -3362.5415       | 0.7009            | -3361.8406                             | 1.7        | -3361.8274          | -7.6                       |
| TSb                                                                            | -3362.4744       | 0.6989            | -3361.7755                             | 40.9       | -3361.7623          | 40.9                       |
| H-NBE-Rh-Rh(dppp)(POMe <sub>3</sub> )(OAc) <sub>2</sub> (D)                    | -3362.5542       | 0.7063            | -3361.8479                             | -3.0       | -3361.8348          | -12.2                      |
| H-Rh-Rh(dppp)(POMe <sub>3</sub> )(OAc) <sub>2</sub> -monodentated<br>(C')      | -3089.9936       | 0.5557            | -3089.4379                             |            | -3089.4246          |                            |
| C'+NBE                                                                         | -3362.4929       | 0.6668            | -3361.8261                             | 0.0        | -3361.798           | 0.0                        |
| TSc                                                                            | -3362.4712       | 0.6996            | -3361.7716                             | 34.1       | -3361.7584          | 24.8                       |
| H-NBE-Rh-Rh(dppp)(POMe <sub>3</sub> )(OAc) <sub>2</sub> -<br>monodentated (D') | -3362.5313       | 0.7050            | -3361.8263                             | -0.2       | -3361.8130          | -9.5                       |
| H-Rh-Rh(dppp)(POMe <sub>3</sub> )(OAc) <sub>2</sub> -monodentated              | -2706.8382       | 0.4617            | -2706.3765                             |            | -2706.3631          |                            |

|                                                                                                                                      |            |        |            |       |            |       |
|--------------------------------------------------------------------------------------------------------------------------------------|------------|--------|------------|-------|------------|-------|
| (C'-model)                                                                                                                           |            |        |            |       |            |       |
| C'-model+NBE                                                                                                                         | -2979.3375 | 0.5728 | -2978.7647 | 0.0   | -2978.7365 | 0.0   |
| TS1                                                                                                                                  | -2979.3139 | 0.6058 | -2978.7081 | 35.6  | -2978.6946 | 26.3  |
| H-NBE-Rh-Rh(dppp)(POMe <sub>3</sub> )(OAc) <sub>2</sub> -<br>monodentated (D'-model)                                                 | -2977.9308 | 0.6114 | -2977.3194 | 1.0   | -2978.7498 | -8.3  |
| (MeO) <sub>3</sub> SiH (2)                                                                                                           | -635.2546  | 0.0881 | -635.1665  |       | -635.1523  |       |
| TS2                                                                                                                                  | -3614.6095 | 0.7325 | -3613.877  | 34.0  | -3613.8637 | 15.7  |
| H-NBE                                                                                                                                | -273.7374  | 0.1343 | -273.6031  |       | -273.5884  |       |
| (MeO) <sub>3</sub> Si-Rh-Rh(dppp)(POMe <sub>3</sub> )(OAc) <sub>2</sub> -<br>monodentated (E'-model)                                 | -3340.9474 | 0.5690 | -3340.3784 |       | -3340.3650 |       |
| H-NBE+E'-model                                                                                                                       | -3614.6848 | 0.7033 | -3613.9815 | -31.5 | -3613.9534 | -40.6 |
| Ph-CH=CH <sub>2</sub> (1)                                                                                                            | -309.3796  | 0.0894 | -309.2902  |       | -309.2756  |       |
| TS3                                                                                                                                  | -3650.2998 | 0.6943 | -3649.6055 | 8.1   | -3649.5921 | -10.2 |
| [(MeO) <sub>3</sub> Si]H <sub>8</sub> C <sub>8</sub> -Rh-Rh(dppp)(POMe <sub>3</sub> )(OAc) <sub>2</sub> -<br>monodentated (F'-model) | -3650.3418 | 0.6918 | -3649.6500 | -20.0 | -3649.6369 | -38.3 |
| TS4a                                                                                                                                 | -3650.3074 | 0.6880 | -3649.6194 | -0.7  | -3649.6061 | -18.9 |
| <i>Tran</i> -(MeO) <sub>3</sub> Si-C=C-Ph ( <i>E</i> -3)                                                                             | -943.4646  | 0.1898 | -943.2748  |       | -943.2609  |       |

|                                                                                                                   |            |        |            |       |            |       |
|-------------------------------------------------------------------------------------------------------------------|------------|--------|------------|-------|------------|-------|
| <i>E</i> -3+C'-model                                                                                              | -3650.3028 | 0.6515 | -3649.6513 | -20.7 | -3649.624  | -30.2 |
| TS4b                                                                                                              | -3650.2940 | 0.6878 | -3649.6062 | 7.6   | -3649.5930 | -10.7 |
| <i>Cis</i> -(MeO) <sub>3</sub> Si-C=C-Ph (Z-3)                                                                    | -942.9566  | 0.1906 | -942.7660  |       | -943.2552  |       |
| Z-3+C'-mode)                                                                                                      | -3649.7948 | 0.6523 | -3649.1425 | -17.2 | -3649.6183 | -26.6 |
| TS5                                                                                                               | -4285.5755 | 0.8112 | -4284.7643 | 12.9  | -4284.7512 | -14.5 |
| (MeO) <sub>3</sub> Si-C-C-Ph (4)                                                                                  | -944.6949  | 0.2102 | -944.4847  |       | -944.4706  |       |
| 4+E'-model                                                                                                        | -4285.6423 | 0.7792 | -4284.8631 | -49.0 | -4284.8356 | -67.4 |
| [(MeO) <sub>3</sub> Si]H <sub>8</sub> C <sub>8</sub> -Rh-Rh(dppp)(OAc) <sub>2</sub> -<br>monodentated (F''-model) | -2963.8401 | 0.5734 | -2963.2667 | 0.0   | -2963.2535 | 0.0   |
| TS4a''                                                                                                            | -2963.8177 | 0.5702 | -2963.2475 | 12.1  | -2963.2342 | 12.1  |
| H-Rh-Rh(dppp)(OAc) <sub>2</sub> -monodentated (C''-model)                                                         | -2020.3310 | 0.3451 | -2019.9859 |       | -2019.9723 |       |
| C''-model+E-3                                                                                                     | -2963.7956 | 0.5349 | -2963.2607 | 3.8   | -2963.2332 | 12.7  |
| TS5''                                                                                                             | -3599.1075 | 0.6944 | -3598.4131 | 12.7  | -3598.3999 | 3.7   |
| (MeO) <sub>3</sub> Si-Rh-Rh(dppp)(POMe <sub>3</sub> )(OAc) <sub>2</sub> -<br>monodentated (E''-model)             | -2654.4364 | 0.4503 | -2653.9861 |       | -2653.9727 |       |
| E''-model+4                                                                                                       | -3599.1313 | 0.6605 | -3598.4708 | -23.5 | -3598.4433 | -23.6 |
| H-Rh-Rh(dppp)(POMe <sub>3</sub> )(OAc) <sub>2</sub> (C-model)                                                     | -2706.8594 | 0.4635 | -2706.3959 |       | -2706.3825 |       |

---

|                                                                                   |            |        |            |            |
|-----------------------------------------------------------------------------------|------------|--------|------------|------------|
| TSa-model                                                                         | -2979.3541 | 0.6024 | -2978.7517 | -2978.7384 |
| INT-model                                                                         | -2979.3861 | 0.6060 | -2978.7801 | -2978.7668 |
| TSb-model                                                                         | -2979.3194 | 0.6043 | -2978.7151 | -2978.7017 |
| H-NBE-Rh-Rh(dppp)(POMe <sub>3</sub> )(OAc) <sub>2</sub> (D-model)                 | -2979.3978 | 0.6127 | -2978.7851 | -2978.7718 |
| (MeO) <sub>3</sub> Si-Rh-Rh(dppp)(POMe <sub>3</sub> )(OAc) <sub>2</sub> (E-model) | -3340.9669 | 0.5696 | -3340.3973 | -3340.3840 |

---

1 Hartree = 627.5094kcal/mol

Table S3 ADF results for TSa, INT, TSb and TSc.

| kcal/mol              | TSa    | INT    | TSb    | TSc    |
|-----------------------|--------|--------|--------|--------|
| $E_{\text{Pauli}}$    | 52.5   | 24.7   | 154.7  | 172.8  |
| $E_{\text{electr}}$   | -25.7  | -13.8  | -76.3  | 111.9  |
| $E_{\text{orb}}$      | -168.2 | -197.6 | -227.6 | -213.1 |
| $E_{\text{disp}}$     | -10.6  | -9.3   | -11.9  | -12.4  |
| $E_{\text{int}}$      | -152.1 | -196.7 | -161.1 | -164.6 |
| $E_{\text{steric}}$   | 26.7   | 10.9   | 78.4   | 60.9   |
| $E_{\text{electr}}\%$ | 12.6   | 6.3    | 24.2   | 33.2   |
| $E_{\text{orb}}\%$    | 82.2   | 89.3   | 72.3   | 63.2   |
| $E_{\text{disp}}\%$   | 5.2    | 4.5    | 3.8    | 4.4    |
| $E_{\text{steric}}\%$ | 51.0   | 44.0   | 50.7   | 35.2   |

Table S4 ADF results for the simplified of the TSa, INT, TSb and TSc.

| kcal/mol              | TSa    | INT    | TSb    | TSc    |
|-----------------------|--------|--------|--------|--------|
| $E_{\text{Pauli}}$    | 50.2   | 21.2   | 138.3  | 180.8  |
| $E_{\text{electr}}$   | -24.1  | -11.3  | -68.0  | -115.8 |
| $E_{\text{orb}}$      | -167.0 | -186.7 | -219.9 | -220.6 |
| $E_{\text{disp}}$     | -9.0   | -8.1   | -9.9   | -10.2  |
| $E_{\text{int}}$      | -149.8 | -184.8 | -159.4 | -165.8 |
| $E_{\text{steric}}$   | 26.2   | 10.0   | 70.4   | 65.0   |
| $E_{\text{electr}}\%$ | 12.0   | 5.5    | 22.8   | 33.4   |
| $E_{\text{orb}}\%$    | 83.5   | 90.6   | 73.8   | 63.6   |
| $E_{\text{disp}}\%$   | 4.5    | 3.9    | 3.3    | 2.9    |
| $E_{\text{steric}}\%$ | 52.1   | 47.0   | 50.9   | 35.9   |

Table S5 ADF results for TS4a, TS4b and TS5.

| kcal/mol              | TS4a   | TS5   | TS4b   |
|-----------------------|--------|-------|--------|
| $E_{\text{Pauli}}$    | 183.5  | 146.0 | 189.7  |
| $E_{\text{electr}}$   | -108.5 | -81.8 | -102.9 |
| $E_{\text{orb}}$      | -98.3  | -94.9 | -102.9 |
| $E_{\text{disp}}$     | -17.6  | -16.3 | -15.1  |
| $E_{\text{int}}$      | -40.9  | -47.0 | -27.9  |
| $E_{\text{steric}}$   | 75.0   | 64.3  | 86.8   |
| $E_{\text{electr}}\%$ | 48.4   | 42.4  | 46.6   |
| $E_{\text{orb}}\%$    | 43.8   | 46.6  | 48.4   |
| $E_{\text{disp}}\%$   | 7.8    | 8.4   | 6.8    |
| $E_{\text{steric}}\%$ | 40.9   | 44.0  | 45.8   |

$$E_{\text{electr}}\% = E_{\text{electr}}/(E_{\text{orb}} + E_{\text{disp}} + E_{\text{electr}}); E_{\text{orb}}\% = E_{\text{orb}}/(E_{\text{orb}} + E_{\text{disp}} + E_{\text{electr}}); E_{\text{disp}}\% = E_{\text{disp}}/(E_{\text{orb}} + E_{\text{disp}} +$$

$$E_{\text{electr}}); E_{\text{steric}}\% = E_{\text{steric}}/E_{\text{Pauli}}$$
